# Supplementary material
Source: publisher site journal article supplement (https://www.dovepress.com/get_supplementary_file.php?f=335011.docx)
Supplement: Supplementary file 1 [file get_supplementary_file.php]

**Supplementary Table 1. Extra ultrasound/ Magnetic Resonance Imaging (MRI) findings in addition to bilateral ventriculomegaly**

| **Case number** | **Maternal Age** | **Degree** | **Extra findings** |
| --- | --- | --- | --- |
| 1 | 28 | Mild | Enlarged kidneys, tricuspid regurgitation |
| 2 | 28 | Moderate | Dextrocardia, single atrium, atrioventricular septal defect, common atrioventricular valve, ventricular reversal, permanent arterial trunk, mirrored right aortic arch; Thickened nuchal fold, atypical vein expansion, permanent left superior vena cava, absence of venous catheter |
| 3 | 24 | Mild | Echogenic bowel |
| 4 | 35 | Mild | Polyhydramnios |
| 5 | 30 | Mild | Echogenic bowel |
| 6 | 32 | Mild | Fetal growth restriction |
| 7 | 35 | Mild | Tricuspid regurgitation |
| 8 | 36 | Moderate | Ventricular septal defects, tricuspid regurgitation |
| 9 | 38 | Moderate | Corpus callosum dysplasia, Dandy_Walker, renal collecting system separate |
| 10 | 28 | Sever | Spina bifida with myelomeningocele |
| 11 | 21 | Mild | Pulmonary artery stenosis, severe tricuspid regurgitation, intracranial hemorrhage |
| 12 | 22 | Sever | Ventricular septal defects, nuchal cystic hygroma |
| 13 | 26 | Mild | Thickened nuchal fold |
| 14 | 27 | Mild | Diaphragmatic hernia, heart dextroposition |
| 15 | 37 | Mild | Dandy_Walker, single umbilical artery |
| 16 | 40 | Sever | Cerebellar dysplasia |
| 17 | 17 | Sever | Endocardial cushion defect, facial deformity, umbilical bulge |
| 18 | 31 | Moderate | Corpus callosum dysplasia |
| 19 | 32 | Mild | Dandy_Walker |
| 20 | 36 | Sever | Tricuspid regurgitation, echogenic bowel |
| 21 | 29 | Moderate | Absence of the corpus callosum |
| 22 | 34 | Mild | Ventricular septal defects |
| 23 | 27 | Mild | Cleft lip and palate |
| 24 | 29 | Mild | Fetal growth restriction |
| 25 | 22 | Sever | Adducted thumbs in both hands, suspected X-linked hydrocephalus syndrome |
| 26 | 24 | Mild | nuchal cystic lymphangioma |
| 27 | 26 | Sever | Persistent arterial trunk type II, right aortic arch；Corpus callosum dysplasia |
| 28 | 28 | Sever | Spina bifida spina bulge; single umbilical artery |
| 29 | 28 | Sever | Corpus callosum dysplasia, cleft lip and palate, wide eye distance; missing or dysplasia of the left foot metatarsal |
| 30 | 29 | Mild | Intracranial hemorrhage, cerebellar vermis dysplasia |
| 31 | 30 | Mild | Corpus callosum dysplasia |
| 32 | 22 | Mild | Bilateral choroid plexus cyst |
| 33 | 24 | Mild | Echogenic intracardiac focus |
| 34 | 23 | Moderate | Ventricular septal defect, straddling aorta, pulmonary artery stenosis; small thymus, thickened nuchal fold, nasal bone dysplasia |
| 35 | 24 | Mild | Fetal growth restriction；nasal bone dysplasia |
| 36 | 26 | Mild | Corpus callosum dysplasia |
| 37 | 26 | Mild | Mild bilateral renal pelvis separation; mild tricuspid and pulmonary regurgitation |
| 38 | 26 | Moderate | Dandy_Walker, fetal growth restriction, echogenic bowel |
| 39 | 27 | Mild | Corpus callosum dysplasia, tricuspid regurgitation |
| 40 | 28 | Sever | Cerebellar hypoplasia |
| 41 | 29 | Mild | Renal collection system separation |
| 42 | 30 | Mild | echogenic intracardiac focus, mild tricuspid regurgitation |
| 43 | 30 | Sever | Giant gyrus, dysplasia of the corpus callosum, small cerebellar hemispheres |
| 44 | 30 | Sever | Fatal skeletal dysplasia |
| 45 | 31 | Mild | Visceral reversal,Dextrocardia, Mild tricuspid regurgitation |
| 46 | 33 | Mild | Edema；Ventricular septal defect, tricuspid regurgitation, Permanent right umbilical vein with widened venous catheter |
| 47 | 37 | Mild | Corpus callosum dysplasia, Spinal abnormalities, Talipes, Thickened nuchal fold, echogenic intracardiac focus |
| 48 | 24 | Sever | Corpus callosum dysplasia |
| 49 | 25 | Sever | Lumbar dysplasia, Thickened nuchal thickness |
| 50 | 26 | Moderate | Polyhydramnios；Abnormal digestive tract development |
| 51 | 26 | Mild | Ventricular septal defect |
| 52 | 26 | Mild | Oligohydramnios；Left heart dysplasia, Bilateral polycystic dysplastic kidney |
| 53 | 26 | Mild | Mild tricuspid regurgitation |
| 54 | 26 | Sever | Cerebellar hypoplasia；Ventricular septal defect,Pulmonary artery stenosis；Spinal dysplasia |
| 55 | 27 | Mild | Hyperechoic white matter |
| 56 | 27 | Mild | Mild separation of renal collection system |
| 57 | 27 | Mild | Cerebellar vermis dysplasia；Polyhydramnios, Talipes |
| 58 | 27 | Mild | Echogenic intracardiac focus |
| 59 | 27 | Mild | Mild tricuspid regurgitation, Mild separation of renal collection system |
| 60 | 27 | Mild | Mild separation of renal collection system |
| 61 | 27 | Mild | Mild tricuspid regurgitation |
| 62 | 27 | Sever | Spina bifida with myelomeningocele,Talipes |
| 63 | 28 | Mild | Mild tricuspid regurgitation |
| 64 | 28 | Mild | Ventricular septal defect |
| 65 | 29 | Mild | Ventricular septal defect, Echogenic intracardiac focus |
| 66 | 29 | Mild | Dandy-Walker |
| 67 | 29 | Mild | Fetal growth restriction, Thickened nuchal fold, Perpetual left superior vena cava；echogenic intracardiac focus, Echogenic bowel, Single umbilical artery |
| 68 | 30 | Mild | Mild tricuspid regurgitation |
| 69 | 31 | Mild | Ventricular septal defect, migration anomaly, Fetal growth restriction |
| 70 | 32 | Mild | Mild separation of renal collection system |
| 71 | 33 | Mild | Polyhydramnios, Cleft lip and tongue；nuchal cystic lymphangioma |
| 72 | 33 | Moderate | Fetal growth restriction |
| 73 | 33 | Mild | Mild tricuspid regurgitation |
| 74 | 33 | Sever | Cleft lip and palate |
| 75 | 35 | Mild | Corpus callosum dysplasia, Ventricular septal defect, intestinal atresia |
| 76 | 21 | Mild | Abnormal blood flow spectrum of umbilical artery |
| 77 | 22 | Mild | Cerebellar hypoplasia, Slightly thickened anterior soft tissue |
| 78 | 27 | Moderate | Mild tricuspid regurgitation |
| 79 | 27 | Mild | pulmonary valve thickening |
| 80 | 30 | Moderate | echogenic intracardiac focus |
| 81 | 19 | Mild | Mild tricuspid regurgitation |
| 82 | 23 | Moderate | Whole body edema, Horseshoe kidney, Talipes |
| 83 | 25 | Mild | Bilateral renal collection system separation |
| 84 | 28 | Mild | Pregnancies with small fetuses, Echogenic bowel |
| 85 | 28 | Mild | Duodenal stenosis |
| 86 | 29 | Mild | Mild tricuspid regurgitation |
| 87 | 29 | Mild | Ventricular septal defect, Mild tricuspid regurgitation |
| 88 | 30 | Mild | Corpus callosum dysplasia, echogenic intracardiac focus, Mild tricuspid regurgitation |
| 89 | 35 | Mild | Nasal bone dysplasia |
| 90 | 26 | Moderate | Left side sylvian fissure, talar fissure, parieto-occipital fissure is low and flat ,Mild tricuspid regurgitation, Thickened nuchal fold |
| 91 | 27 | Moderate | Polyhydramnios |
| 92 | 33 | Moderate | Complete corpus callosum loss; midline area of the brain to the right, cystic structure anterior and superior to the thalamus, arachnoid cyst? Right choroid plexus cyst; mild regurgitation of the secondary and tricuspid valves |
| 93 | 23 | Mild | Mild tricuspid regurgitation |
| 94 | 23 | Mild | Mild tricuspid regurgitation、echogenic intracardiac focus, Renal collection system separation |
| 95 | 24 | Moderate | Polyhydramnios, Renal collection system separation, echogenic intracardiac focus |
| 96 | 25 | Mild | mitral regurgitation, mild tricuspid regurgitation |
| 97 | 26 | Mild | Echogenic bowel |
| 98 | 28 | Mild | Tetralogy of Fallot |
| 99 | 29 | Mild | Ventricular septal defect, Left coronary artery and right atrial fistula |
| 100 | 29 | Sever | Holoprosencephaly |
| 101 | 31 | Moderate | Oligohydramnios；Fetal growth restriction |
| 102 | 23 | Mild | Mild tricuspid regurgitation |
| 103 | 26 | Mild | Microcephaly |
| 104 | 22 | Moderate | Mitral, mild tricuspid regurgitation |
| 105 | 25 | Mild | Tricuspid regurgitation |
| 106 | 31 | Mild | Ventricular septal defect |
| 107 | 27 | Sever | Bilateral renal collection system separation |
| 108 | 29 | Mild | Echogenic bowel |
| 109 | 30 | Mild | Left schizencephaly. hyaline septum dysplasia；small cerebellar vermi, Cervical thoracic dysplasia, left talipes, Pulmonary artery stenosis |
| 110 | 30 | Mild | Polyhydramnios |
| 111 | 29 | Mild | Brain parenchymal abnormalities, corpus callosum dysplasia, left echogenic intracardiac focus |
| 112 | 31 | Mild | Echogenic bowel |
| 113 | 32 | Mild | Ependymal abnormalities, Cerebellar vermis dysplasia, echogenic intracardiac focus, echogenic bowel |
| 114 | 32 | Mild | Corpus callosum dysplasia, Polyhydramnios, Bipedal deformities of both hands |
| 115 | 36 | Mild | Fetal growth restriction |
| 116 | 31 | Mild | Mild tricuspid regurgitation, short femur, short humerus |
| 117 | 40 | Mild | Short humerus |
| 118 | 24 | Mild | Fetal growth restriction |
| 119 | 28 | Mild | Mild tricuspid regurgitation |
| 120 | 30 | Sever | Intracranial hemorrhage |
| 121 | 36 | Sever | Polyhydramnios |
| 122 | 38 | Sever | Congenital cataract in the right eye |
| 123 | 21 | Mild | Short femur, Single umbilical artery |
| 124 | 27 | Moderate | Absence of the corpus callosum |
| 125 | 29 | Moderate | Mild tricuspid regurgitation |
| 126 | 30 | Mild | Echogenic bowel |
| 127 | 31 | Mild | Corpus callosum dysplasia ,midline brain abnormalities |
| 128 | 24 | Mild | Polyhydramnios, Echogenic bowel |
| 129 | 25 | Moderate | Polyhydramnios；Visceral reversal, Double Superior Vena Cava, aortic stenosis |
| 130 | 26 | Mild | Polyhydramnios |
| 131 | 26 | Mild | Fetal growth restriction, Echogenic bowel, Polyhydramnios |
| 132 | 29 | Sever | Holoprosencephaly |
| 133 | 19 | Mild | Echogenic intracardiac focus |
| 134 | 21 | Mild | Echogenic bowel |
| 135 | 23 | Sever | Ventricular septal defect |
| 136 | 28 | Mild | Aberrant right subclavian artery |
| 137 | 28 | Mild | Ventricular septal defect |
| 138 | 28 | Mild | Echogenic bowel |
| 139 | 29 | Moderate | Enlarged kidney, periventricular echoenhance |
| 140 | 30 | Moderate | Left renal collection system separation |
| 141 | 21 | Moderate | Corpus callosum dysplasia, Mild tricuspid regurgitation |
| 142 | 23 | Moderate | Small fetus |
| 143 | 24 | Mild | Mild tricuspid regurgitation, bilateral renal collection system separation |
| 144 | 25 | Mild | Echogenic bowel, Mild tricuspid regurgitation |
| 145 | 26 | Sever | Corpus callosum dysplasia |
| 146 | 27 | Moderate | Ventricular septal defect, aortic stenosis, esophageal atresia, Fetal growth restriction, Polyhydramnios |
| 147 | 27 | Mild | infantile polycystic kidneys |
| 148 | 31 | Moderate | Spina bifida meningocele, congenital cystic adenomatous |
| 149 | 31 | Sever | Corpus callosum dysplasia, Echogenic bowel |
| 150 | 34 | Sever | Intracranial hemorrhage |
| 151 | 34 | Sever | Arachnoid Cysts |
| 152 | 39 | Mild | Fetal growth restriction |
| 153 | 23 | Moderate | Arachnoid Cysts, Echogenic bowel |
| 154 | 27 | Mild | Cavum vergae dilation |
| 155 | 30 | Mild | Persistent left superior vena cava, Mild tricuspid regurgitation |
| 156 | 21 | Moderate | Enlarged cisterna magna |
| 157 | 25 | Moderate | Intracranial hemorrhage |
| 158 | 27 | Mild | Small fetus |
| 159 | 27 | Moderate | Intracranial hemorrhage |
| 160 | 27 | Mild | Enlarged cisterna magna |
| 161 | 27 | Mild | Enlarged cisterna magna |
| 162 | 30 | Sever | Intracranial hemorrhage |
| 163 | 36 | Mild | Subependymal cysts |
| 164 | 27 | Mild | Polyhydramnios, eft hydronephrosis ,echogenic bowel |
| 165 | 28 | Mild | Ventricular septal defect, aortic stenosis, Persistent left superior vena cava, Echogenic bowel |
| 166 | 19 | Mild | Fetal growth restriction |
| 167 | 20 | Sever | Spina bifida with meningocele |
| 168 | 22 | Moderate | Polyhydramnios, Fetal growth restriction |
| 169 | 24 | Sever | Hydrocephalus |
| 170 | 25 | Mild | Corpus callosum dysplasia |
| 171 | 25 | Moderate | Arachnoid Cysts |
| 172 | 27 | Mild | Mild separation of renal collection system |
| 173 | 30 | Mild | Polyhydramnios, pulmonary artery stenosis, duodenal atresia |
| 174 | 31 | Mild | Mild tricuspid regurgitation, posterior fossa pool broadening |
| 175 | 37 | Mild | Polyhydramnios, Dandy_Walker； |
| 176 | 26 | Moderate | Fetal growth restriction |
| 177 | 28 | Mild | Polyhydramnios |
| 178 | 29 | Moderate | Posterior fossa pool broadening |
| 179 | 30 | Moderate | Cerebellum dysplasia, posterior fossa pool broadening, Right lung dysplasia, Pleural effusion |
| 180 | 35 | Mild | Single umbilical artery |
| 181 | 24 | Moderate | Corpus callosum dysplasia, Mild tricuspid regurgitation |
| 182 | 25 | Sever | Cerebellum dysplasia, Fetal growth restriction |
| 183 | 26 | Sever | Intracranial hemorrhage |
| 184 | 27 | Moderate | Bilateral subependymal cysts |
| 185 | 27 | Moderate | Intracranial hemorrhage |
| 186 | 29 | Mild | Posterior fossa pool broadening |
| 187 | 31 | Mild | Subependymal cysts |
| 188 | 31 | Mild | Polyhydramnios |
| 189 | 22 | Moderate | Polyhydramnios |
| 190 | 23 | Mild | Fetal growth restriction, Cerebellum dysplasia, the third and fourth ventricle dilation |
| 191 | 26 | Mild | Thickened nuchal fold |
| 192 | 24 | Moderate | Polyhydramnios |
| 193 | 27 | Mild | Fetal growth restriction |
| 194 | 23 | Moderate | Mild tricuspid regurgitation |
| 195 | 27 | Mild | Bilateral subependymal cysts |
| 196 | 33 | Sever | Polyhydramnios |
| 197 | 23 | Moderate | Bilateral subependymal cysts |
| 198 | 30 | Mild | Polyhydramnios |
| 199 | 35 | Mild | Sponge kidney, Polytoed |
| 200 | 35 | Mild | Asphyxia thoracic dysplasia |
